# Supplementary material for: Metal-assisted synthesis of salen-based porous organic polymer for highly efficient fixation of CO2 into cyclic carbonates
Source: Royal Society of Chemistry journal article supplement (doi:10.1039/d1qi01643a), 2022-01-01
Supplement: d1qi01643a1.pdf [file d1qi01643a1.pdf]

**Metal-assisted synthesis of salen-based porous organic polymer for high efficient  
fixation of CO<sub>2</sub> into cyclic carbonates**

Gang Yuan, Yin Lei, Xianyu Meng, Bangdi Ge, Yu Ye, Xiaowei Song\* and Zhiqiang  
Liang\*

State Key Laboratory of Inorganic Synthesis and Preparative Chemistry, College of  
Chemistry, Jilin University, Changchun 130012, P. R. China

\*Corresponding Authors.

E-mail addresses: xiaowei song@jlu.edu.cn (X. Song); liangzq@jlu.edu.cn (Z. Liang).

## **Materials and characterizations**

All chemicals were obtained from commercial suppliers and used without further purification. Fourier transform infrared (FTIR) spectra were recorded in the range of 400–4000  $\text{cm}^{-1}$  on a Nicolet 6700 FT-IR spectrometer with KBr pellets. X-ray photoelectron spectroscopy (XPS) were performed using an ESCALAB 250 spectrometer with a monochromatic X-ray source (Al  $K\alpha$   $h\nu=1486.6$  eV). The X-ray diffraction (XRD) patterns were recorded using a Rigaku D/Max 2550 X-ray diffractometer (Cu  $K\alpha$  radiation,  $\lambda = 1.5406$  Å). The content of metal in products were determined with inductively coupled plasma (ICP) analyses carried out on a Perkin-Elmer Optima 3300 DV ICP instrument. Elemental analyses (C, H, and N) were performed with a Vario MICRO (Elementar, Germany). Surface morphologies were characterized using a JSM-7800 F field emission scanning electron microscope (SEM) at an accelerating voltage of 3 kV. Transmission electron microscopy (TEM) were conducted on a FEI Tecnai G2S-Twin with a field emission gun operating at 200 kV. Thermal gravimetric analyses (TGA) were carried out on a TGA Q500 thermogravimetric analyzer in air atmosphere at a heating rate of 10  $^{\circ}\text{C min}^{-1}$ . The Micromeritics ASAP 2020 instrument was used to evaluate the adsorption properties of  $\text{N}_2$ ,  $\text{CO}_2$  with the samples degassed at 120  $^{\circ}\text{C}$  for 10 h before testing under high vacuum. Solution-state  $^1\text{H}$  spectra were recorded on a Varian Mercury spectrometer operating at frequency of 300 MHz.

## Experimental section

### Synthesis of Mn-salen-POP

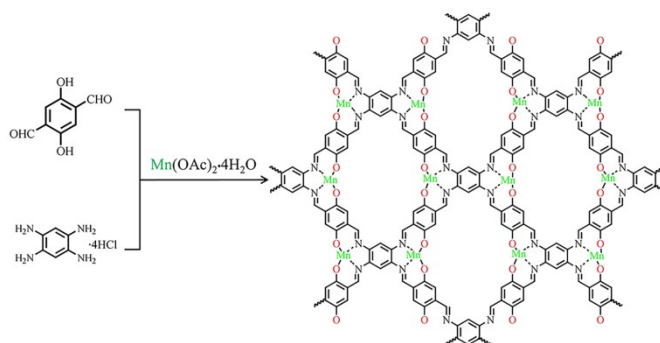

A mixture of mesitylene/1,4-dioxane (0.5 mL/1.5 mL), 1,2,4,5-benzenetetramine tetrahydrochloride (BTA) (20 mg, 0.07 mmol), 2,5-dihydroxy-1,4-benzenedicarboxaldehyde (HBC) (27 mg, 0.14 mmol) and 0.28 mmol  $\text{Mn(OAc)}_2 \cdot 4\text{H}_2\text{O}$  was degassed in a pyrex tube (5 mL) by three freeze-pump-thaw cycles. The tubes were sealed off and heated at 150 °C for 3 days. The resulting products were collected by filtration and washed with  $\text{H}_2\text{O}$  ( $3 \times 20$  mL), DMF ( $3 \times 20$  mL) and MeOH ( $3 \times 20$  mL), respectively. The sample was transferred to a Soxhlet extractor and washed with tetrahydrofuran (THF) (24 h) then dried at 80 °C under vacuum for 24 h to give black powders with 81% yields.

### Synthesis of Co-salen-POP

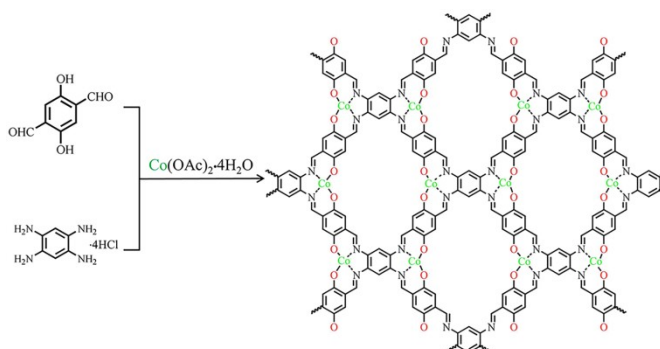

A mixture of mesitylene/1,4-dioxane (0.5 mL/1.5 mL), BTA (20 mg, 0.07 mmol), HBC (27 mg, 0.14 mmol) and 0.28 mmol  $\text{Co(OAc)}_2 \cdot 4\text{H}_2\text{O}$  was degassed in a pyrex tube (5 mL) by three freeze-pump-thaw cycles. The tubes were sealed off and heated at 150 °C for 3 days. The resulting products were collected by filtration and washed with  $\text{H}_2\text{O}$  ( $3 \times 20$  mL), DMF ( $3 \times 20$  mL) and MeOH ( $3 \times 20$  mL), respectively. The

sample was transferred to a Soxhlet extractor and washed with THF (24 h) then dried at 80 °C under vacuum for 24 h to give black powders with 84% yields.

### Synthesis of Ni-salen-POP

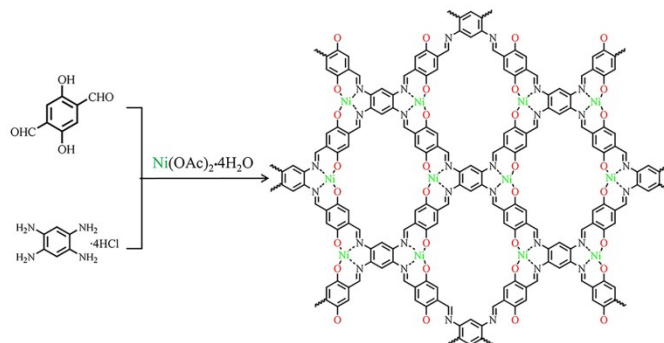

A mixture of mesitylene/1,4-dioxane (0.5 mL/1.5 mL), BTA (20 mg, 0.07 mmol), HBC (27 mg, 0.14 mmol) and 0.28 mmol  $\text{Ni(OAc)}_2 \cdot 4\text{H}_2\text{O}$  was degassed in a pyrex tube (5 mL) by three freeze-pump-thaw cycles. The tubes were sealed off and heated at 150 °C for 3 days. The resulting products were collected by filtration and washed with  $\text{H}_2\text{O}$  ( $3 \times 20$  mL), DMF ( $3 \times 20$  mL) and MeOH ( $3 \times 20$  mL), respectively. The sample was transferred to a Soxhlet extractor and washed with THF (24 h) then dried at 80 °C under vacuum for 24 h to give black powders with 87% yields.

### Synthesis of salen-POP

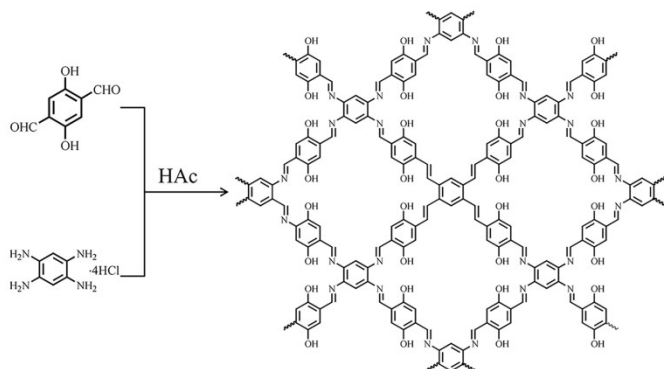

A mesitylene/1,4-dioxane/6M HAc (0.5 mL/1.5 mL/0.2 mL) mixture of BTA (20 mg, 0.07 mmol), HBC (27 mg, 0.14 mmol) in a Pyrex tube (5 mL) was degassed by three freeze-pump-thaw cycles. The tube was sealed off and heated at 150 °C for 3 days. The formed black precipitate was collected by filtration and washed with  $\text{H}_2\text{O}$

(3 × 20 mL), DMF (3 × 20 mL) and MeOH (3 × 20 mL). **salen-POP** was further purified by soxhlet extraction with THF (24 h), then dried at 80 °C under vacuum for 24 h to give black powders.

### **Synthesis of salen-POP/Co**

Salen-POP (100 mg) was dispersed in 6 mL ethanol and the mixture was added into the solution of Co(OAc)<sub>2</sub>·4H<sub>2</sub>O (100 mg, 0.4 mmol). The mixture was refluxed at 80 °C for 12 h. After filtration, the obtained material was fully washed with ethanol and then dried under vacuum at 60 °C for 12 h.

### **Experiment of CO<sub>2</sub> fixation under 0.1 MPa**

For this reaction, styrene oxide (10 mmol), **Co-salen-POP** (30 mg, 0.82 mol%), TBAB (0.1 mmol, 1 mol%) were added into a 10 mL reaction tube. The reaction was carried out at 100 °C in the presence of carbon dioxide provided by the carbon dioxide cylinder. After a certain amount of time, the reaction was stopped. After dissolving a small portion of the product in DMSO-*d*<sub>6</sub> reagent and separating the catalyst through a Nylon filter membrane, the resulting clear solution was characterized by <sup>1</sup>H NMR. The yields were calculated according to the <sup>1</sup>H NMR spectra.

### **The detailed process of isolated yield calculation**

**Co-salen-POP** (30 mg), phenyl glycidyl (10 mmol) and TBAB (0.1 mmol) were added into the reactor. After purging the reactor with CO<sub>2</sub> to remove air three times, the autoclave was pressurized to 1.0 MPa with CO<sub>2</sub>. The temperature was raised to 100 °C in 30 minutes and the reaction proceeded for 5 minutes with stirring at 300 rpm. In the end of reaction, the reactor was quickly cooled to room temperature in an ice water bath and the CO<sub>2</sub> pressure was released from the autoclave. After dissolving

the mixture in ethyl acetate and filtering out the catalyst, the resulting solution was removed under reduced pressure to obtain the product. The isolated yield of corresponding cyclic carbonate of phenyl glycidyl ether was calculated by the formula:  $\text{isolated yield} = \text{experimental yield (1.918 g)} / \text{theoretical yield (1.948 g)}$ .

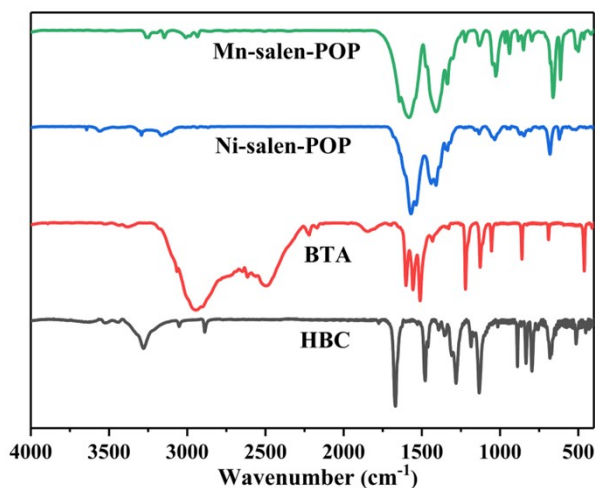

**Fig. S1** FTIR spectra of **Mn-salen-POP** and **Ni-salen-POP**.

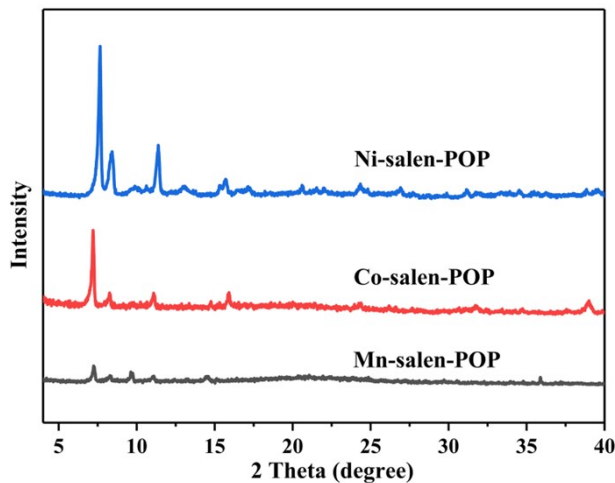

**Fig. S2** Powder XRD patterns of **Mn-salen-POP**, **Co-salen-POP** and **Ni-salen-POP**.

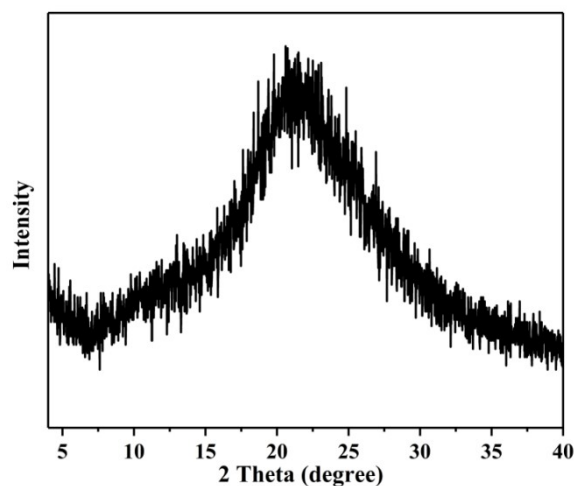

**Fig. S3** Powder XRD pattern of salen-POP.

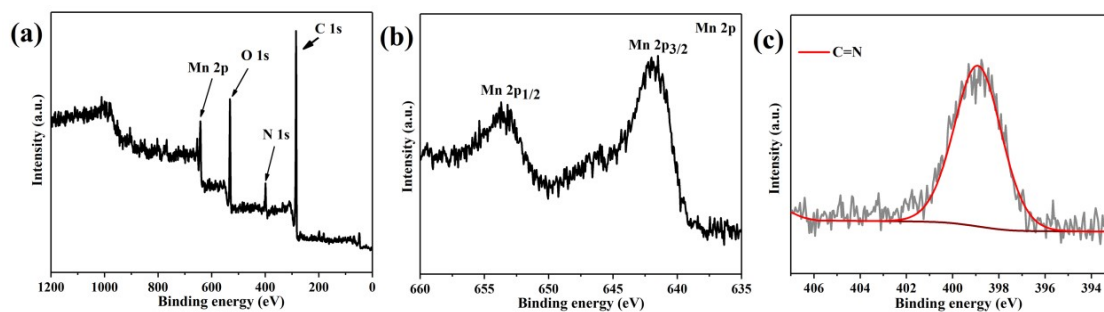

**Fig. S4** (a) XPS survey spectra of Mn-salen-POP. (b) Mn 2p spectra of Mn-salen-POP. (c) N 1s spectra of Mn-salen-POP.

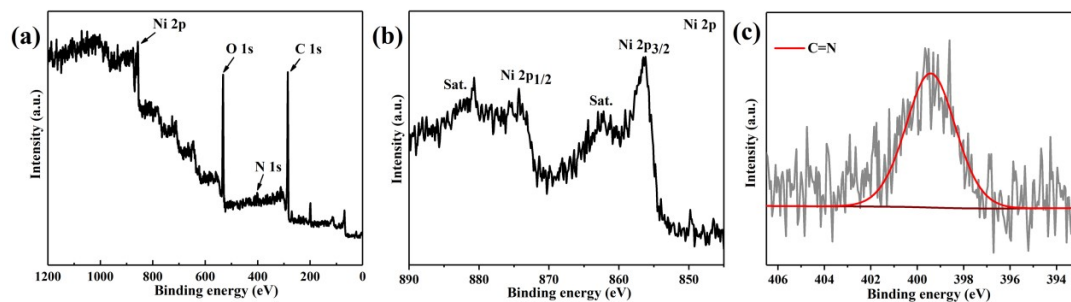

**Fig. S5** (a) XPS survey spectra of Ni-salen-POP. (b) Ni 2p spectra of Ni-salen-POP. (c) N1s spectra of Ni-salen-POP.

**Table S1** CHN elemental analysis and ICP results of metal for catalysts.

| M-Salen-POP                             | CHN Elemental Analysis (wt%) |      |      | Metal content (wt%) |
|-----------------------------------------|------------------------------|------|------|---------------------|
|                                         | C                            | H    | N    |                     |
| <b>Mn-salen-POP</b>                     | 19.48                        | 3.38 | 2.58 | 15.39               |
| <b>Ni-salen-POP</b>                     | 23.24                        | 3.43 | 2.77 | 17.29               |
| <b>Co-salen-POP</b>                     | 17.73                        | 3.10 | 3.53 | 16.13               |
| <b>Co-salen-POP</b><br>(after 5 cycles) | 17.63                        | 3.12 | 3.51 | 16.06               |

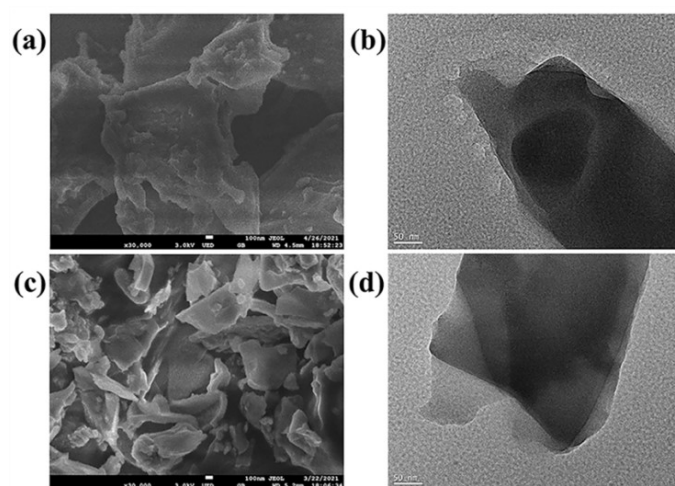

**Fig. S6** (a, b) SEM and TEM images of **Mn-salen-POP**. (c, d) SEM and TEM images of **Ni-salen-POP**.

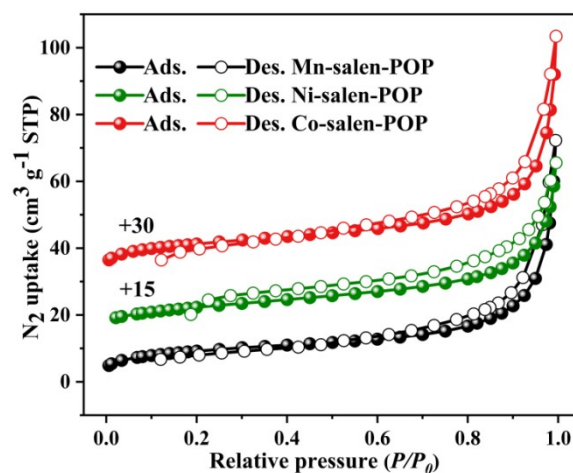

**Fig. S7** N<sub>2</sub> adsorption–desorption isotherms of **Mn-salen-POP**, **Ni-salen-POP** and **Co-salen-POP**.



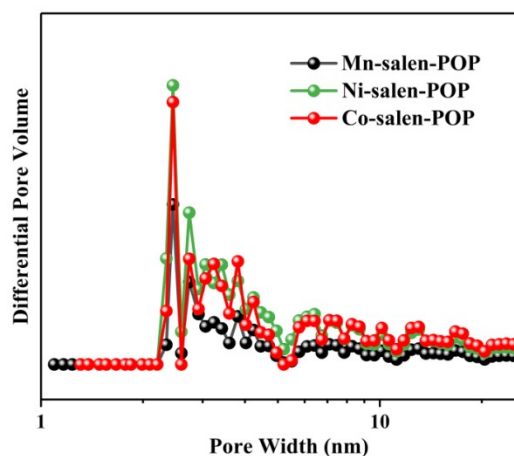

**Fig. S8** Pore size distributions of **Mn-salen-POP**, **Ni-salen-POP** and **Co-salen-POP**.

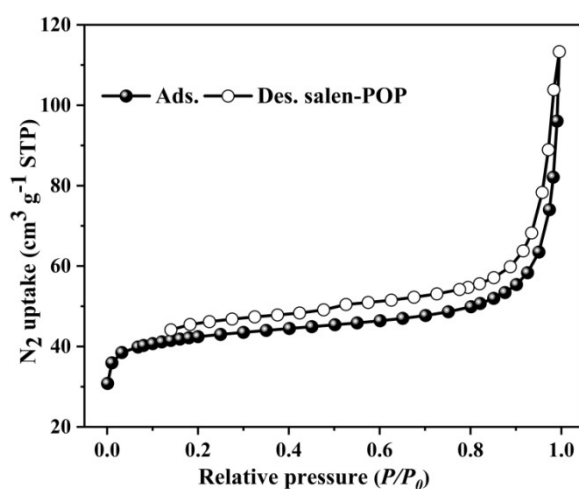

**Fig. S9**  $N_2$  adsorption-desorption isotherms of salen-POP.

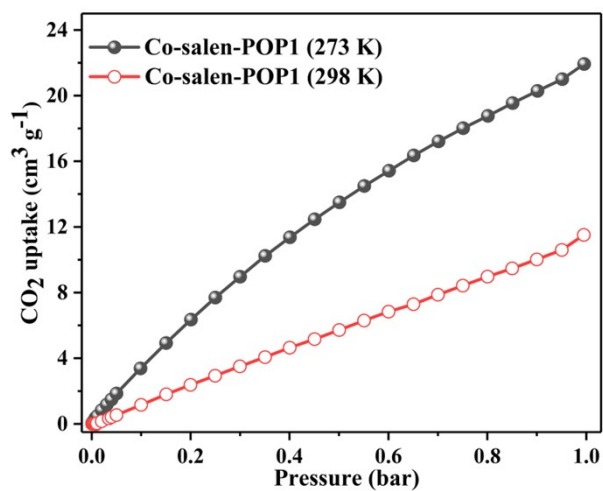

**Fig. S10** Adsorption isotherms of  $CO_2$  of **Co-salen-POP** at 273 and 298 K.

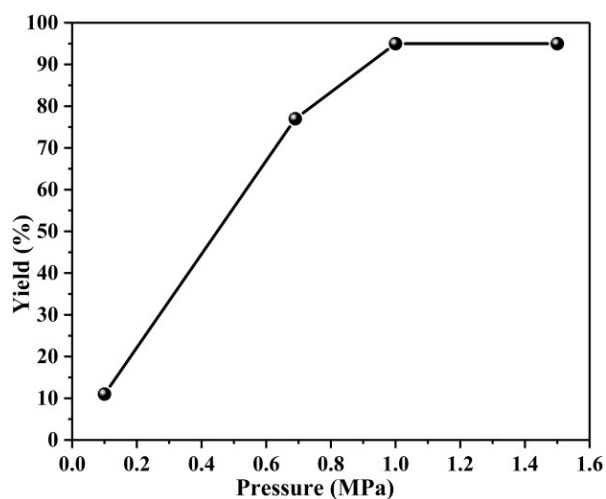

**Fig. S11** Yields of styrene carbonate depending on reaction pressure under 100 °C for 30 min using **Co-salen-POP** (30 mg) as catalyst and TBAB (0.1mmol) as co-catalyst.

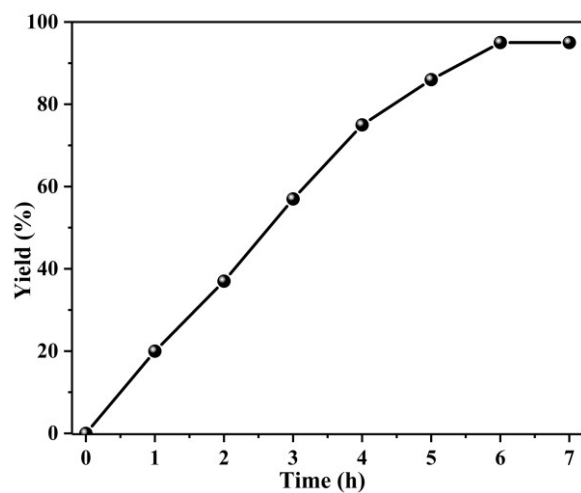

**Fig. S12** Kinetic curve for the cycloaddition reactions of styrene epoxide and CO<sub>2</sub> catalyzed by **Co-salen-POP** (30 mg, 0.82 mol%) with the aid of TBAB (0.1 mmol, 1mol%) at 100 °C and 0.1 MPa CO<sub>2</sub>.

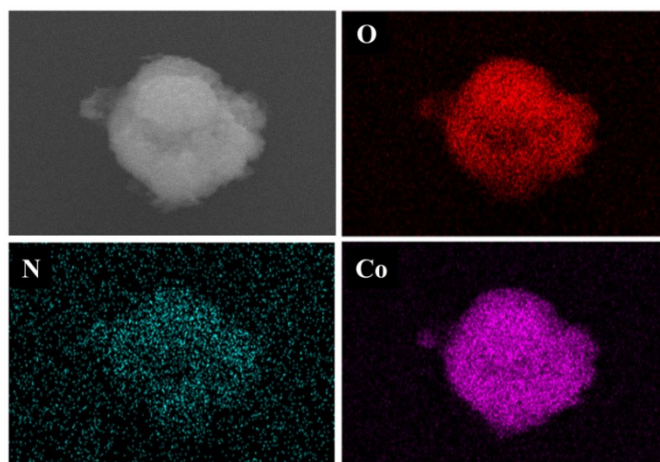

**Fig. S13** SEM & EDS Mapping of **Co-salen-POP** after five catalysis.

**Table S2** Comparison of the activity of **Co-salen-POP** in the PO cycloaddition reaction with the other salen-based POP catalysts.

| Catalyst            | Catalyst<br>(mol%) | T<br>(°C) | Pressure<br>(MPa) | TBAB<br>(mol%) | Time<br>(h) | Yield<br>(%) | Ref.             |
|---------------------|--------------------|-----------|-------------------|----------------|-------------|--------------|------------------|
| <b>Co-salen-POP</b> | 0.54               | 100       | 1                 | 1              | 1/12        | 97           | <b>This work</b> |
| COF-salen-Co        | 0.1                | 100       | 2                 | 1              | 3           | 91           | S1               |
| Co-CMP-2            | 0.41               | 100       | 3                 | 7.2            | 1           | 98.7         | S2               |
| Co-CMP              | 0.488              | 100       | 3                 | 7.2            | 1           | 98.1         | S3               |
| Zn-CMP              | 0.1                | 120       | 3                 | 1.8            | 1           | 74.8         | S4               |
| Zn@SBMMP            | 0.48               | 80        | 2                 | 1.8            | 4           | 95           | S5               |
| Co-salen-TBB-Py     | 0.19               | 80        | 0.5               | none           | 8           | 97.8         | S6               |
| BSPOP-Co            | 0.2                | 25        | 0.1               | 4              | 18          | 92           | S7               |

**Table S3** Comparison of the activity of **Co-salen-POP** in the PO cycloaddition reaction with the reported metalated porous organic polymers and MOFs.

| Catalyst                   | Catalyst<br>(mol%) | T<br>(°C) | Pressure<br>(MPa) | TBAB<br>(mol%) | Time<br>(h) | Yield<br>(%) | Ref. |
|----------------------------|--------------------|-----------|-------------------|----------------|-------------|--------------|------|
| PAF-ZnBr <sub>2</sub>      | 1.7                | 90        | 1                 | 2              | 1           | 71           | S8   |
| Zn-TPAMP                   | 0.011              | 100       | 2                 | 6.5            | 1           | 99           | S9   |
| Al-HCP                     | 0.25               | 40        | 1                 | 2              | 1           | 99           | S10  |
| P-POF-Zn                   | 0.1                | 120       | 3                 | 0.5            | 2.5         | 95           | S11  |
| Al-iPOP-2                  | 0.1                | 40        | 1                 | 0.2            | 3           | 99           | S12  |
| Bp-POF-Cu                  | 0.1                | 100       | 1                 | 0.5            | 6           | 99           | S13  |
| Co-Phen-POP                | 0.025              | 25        | 1                 | 7.2            | 48          | 83.6         | S14  |
| Zn/HAzo-POP1               | 0.062              | 100       | 3                 | 7.2            | 0.5         | 90           | S15  |
| Zn@ah-PMF                  | 0.0085             | 100       | 2                 | 0.6            | 0.5         | 79           | S16  |
| IL-MIL-101-NH <sub>2</sub> | 0.88               | 120       | 1.3               | none           | 1           | 91           | S17  |
| CPP-IL <sub>0.05</sub>     | 1.0                | 100       | 0.1               | none           | 24          | 96           | S18  |

**The detailed process of yield calculation by solution-state <sup>1</sup>H NMR.**

The yields of propylene oxide, epichlorohydrin, styrene oxide, allyl glycidyl ether, phenyl glycidyl ether, *o*-tolyl glycidyl ether and cyclohexene oxide to corresponding cyclic carbonates catalyzing by **Co-salen-POP** were calculated according to the following equation. As all of the epoxides and cyclic carbonates are known compounds, the characteristic peaks were pointed out according to reference.

$$\text{Yield}(\%) = \frac{I_{H_{a'}}}{I_{H_a} + I_{H_{a'}}} \times 100\%$$

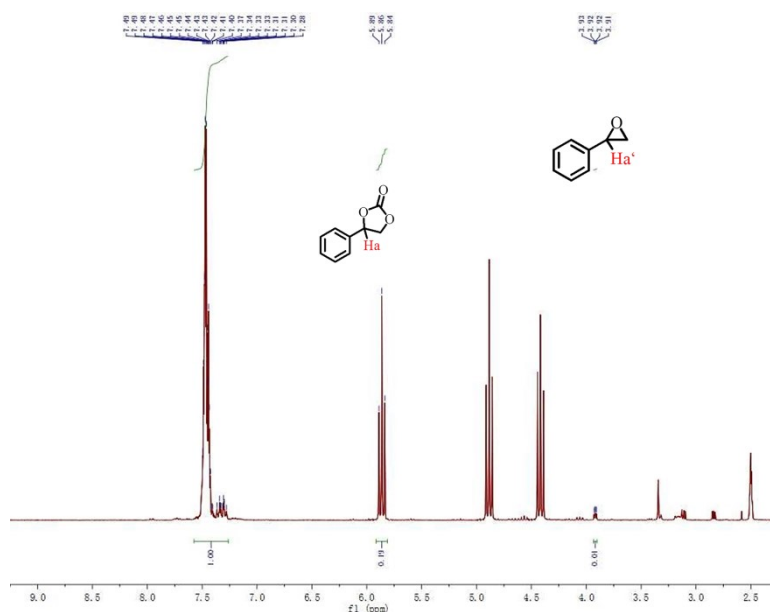

**Fig. S14** Solution-state <sup>1</sup>H NMR of the crude products in the cycloaddition reaction catalyzed by the **Co-salen-POP** catalyst with styrene epoxide as substrate (DMSO-*d*<sub>6</sub> as solvent).

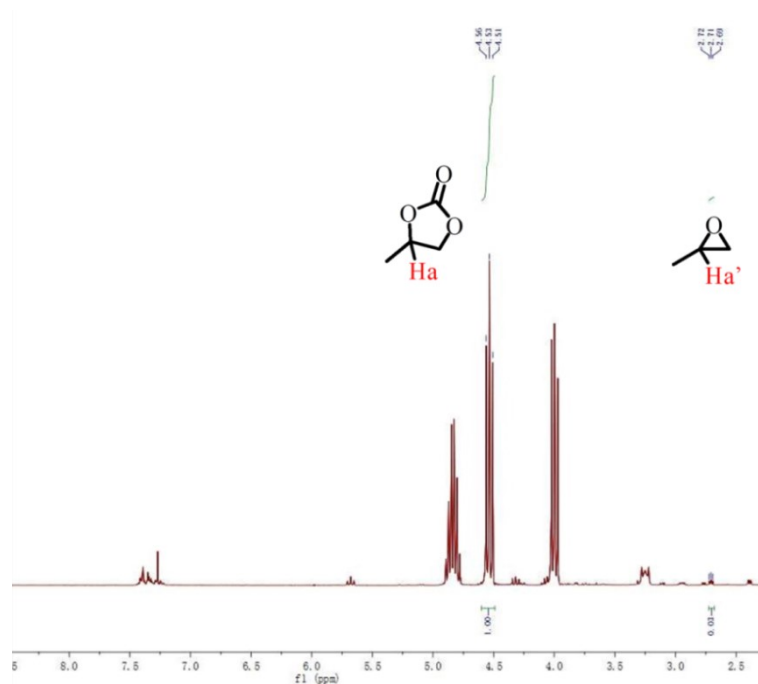

**Fig. S15** Solution-state <sup>1</sup>H NMR of the crude products in the cycloaddition reaction catalyzed by the **Co-salen-POP** catalyst with propylene oxide as substrate (CDCl<sub>3</sub> as solvent).

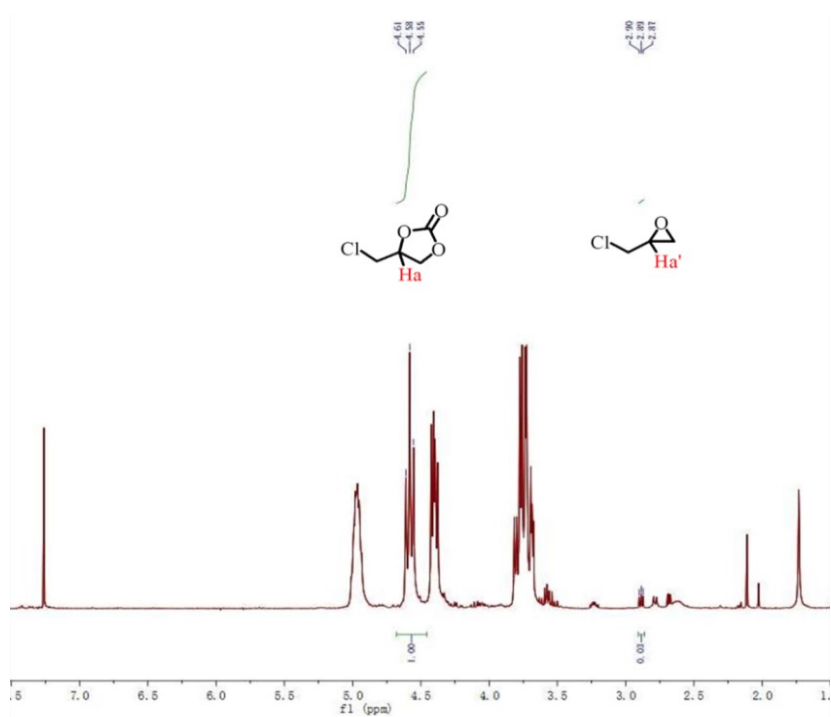

**Fig. S16** Solution-state <sup>1</sup>H NMR of the crude products in the cycloaddition reaction catalyzed by the **Co-salen-POP** catalyst with epichlorohydrin as substrate (CDCl<sub>3</sub> as solvent).

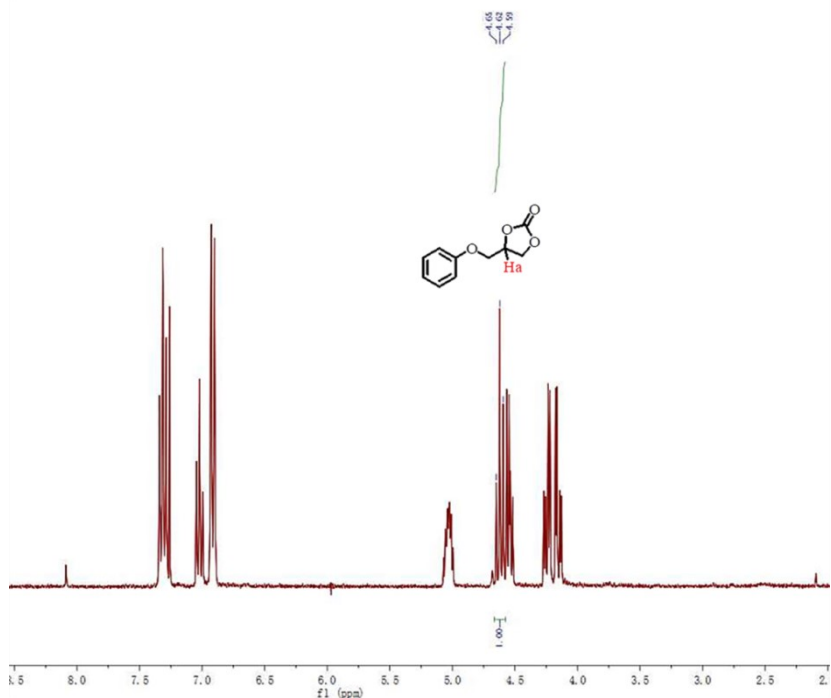

**Fig. S17** Solution-state <sup>1</sup>H NMR of the crude products in the cycloaddition reaction catalyzed by the **Co-salen-POP** catalyst with phenyl glycidyl ether as substrate (CDCl<sub>3</sub> as solvent).

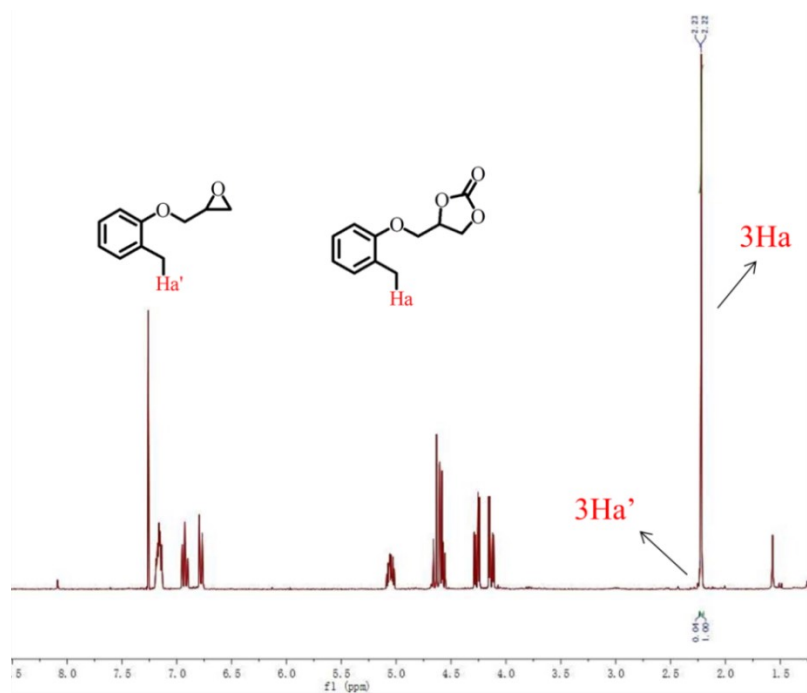

**Fig. S18** Solution-state <sup>1</sup>H NMR of the crude products in the cycloaddition reaction catalyzed by the **Co-salen-POP** catalyst with *o*-tolyl glycidyl ether as substrate (CDCl<sub>3</sub> as solvent).

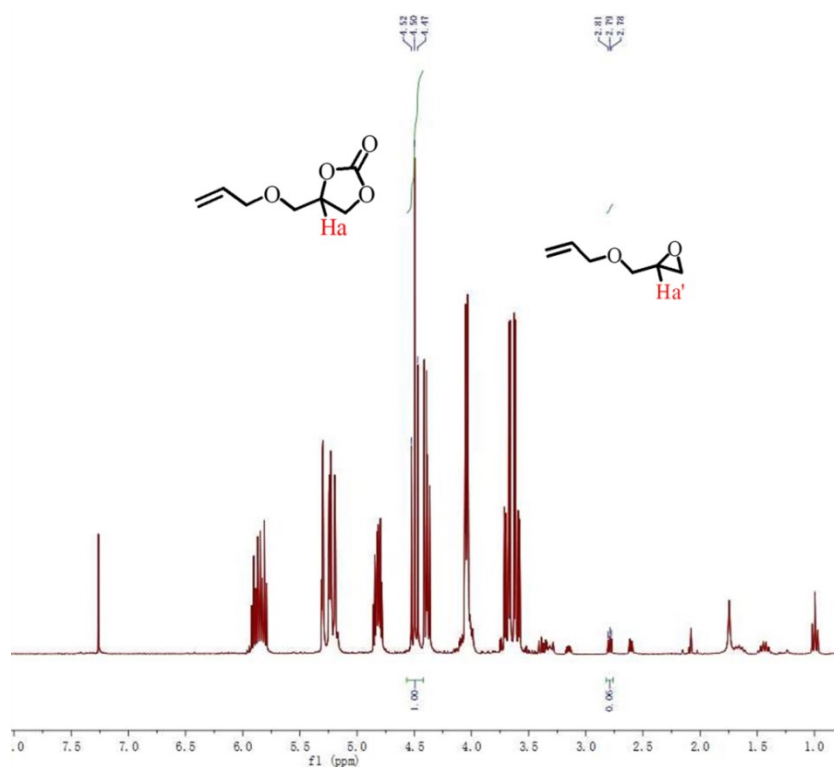

**Fig. S19** Solution-state <sup>1</sup>H NMR of the crude products in the cycloaddition reaction catalyzed by the **Co-salen-POP** catalyst with allyl glycidyl ether as substrate (CDCl<sub>3</sub> as solvent).

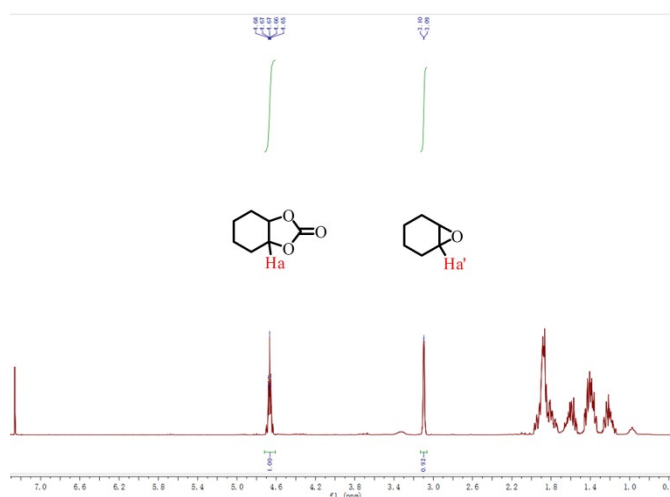

**Fig. S20** Solution-state  $^1\text{H}$  NMR of the crude products in the cycloaddition reaction catalyzed by the **Co-salen-POP** catalyst with cyclohexene oxide as substrate ( $\text{CDCl}_3$  as solvent).

**Table S3** Details of reagents used in this work.

| Reagent                          | Manufacturer                                        | Purity (%)  |
|----------------------------------|-----------------------------------------------------|-------------|
| TBAB                             | Tianjin guangfu fine chemical<br>research institute | 99          |
| Styrene epoxide                  | Aladdin                                             | $\geq 95$   |
| Propylene oxide                  | Aladdin                                             | $\geq 99.5$ |
| Epichlorohydrin                  | Tianjin fuchen chemical reagent<br>factory          | 98          |
| Allyl glycidyl ether             | Aladdin                                             | 99          |
| Phenyl glycidyl ether            | Macklin                                             | $> 98$      |
| 2-methylphenyl glycidyl<br>ether | Aladdin                                             | 95          |
| Ethyl acetate                    | Tianjin fuyu fine chemical<br>company limited       | 99          |
| DMSO- $d_6$                      | Aldrich                                             | 99.9        |
| $\text{CDCl}_3$                  | Aladdin                                             | 99          |
| 1,4-dioxane                      | Tianjin fuyu fine chemical<br>company limited       | 99.5        |



|                                                |                                                    |      |
|------------------------------------------------|----------------------------------------------------|------|
| mesitylene                                     | Macklin                                            | 97   |
| 1,2,4,5-benzenetetramine<br>tetrahydrochloride | Zhenzhou Alfa chemical company                     | 95   |
| 2,5-dihydroxy-1,4-<br>benzenedicarboxaldehyde  | Zhenzhou Alfa chemical company                     | 96   |
| Co(OAc) <sub>2</sub> ·4H <sub>2</sub> O        | China National Pharmaceutical<br>Group Corporation | 99.5 |
| Mn(OAc) <sub>2</sub> ·4H <sub>2</sub> O        | China National Pharmaceutical<br>Group Corporation | 99.5 |
| Ni(OAc) <sub>2</sub> ·4H <sub>2</sub> O        | China National Pharmaceutical<br>Group Corporation | 99.5 |

---

## References

- S1. H. Li, X. Feng, P. Shao, J. Chen, C. Li, S. Jayakumar and Q. Yang, Synthesis of covalent organic frameworks via in situ salen skeleton formation for catalytic applications, *J. Mater. Chem. A*, 2019, **7**, 5482–5492.
- S2. J. Xiong, R.-X. Yang, Y. Xie, N.-Y. Huang, K. Zou and W.-Q. Deng, Formation of cyclic carbonates from CO<sub>2</sub> and epoxides catalyzed by a cobalt-coordinated conjugated microporous polymer, *ChemCatChem*, 2017, **9**, 2584–2587.
- S3. Y. Xie, T.-T. Wang, X.-H. Liu, K. Zou and W.-Q. Deng, Capture and conversion of CO<sub>2</sub> at ambient conditions by a conjugated microporous polymer, *Nat. Commun.*, 2013, **4**, 1960.
- S4. Y. Xie, T.-T. Wang, R.-X. Yang, N.-Y. Huang, K. Zou and W.-Q. Deng, Efficient fixation of CO<sub>2</sub> by a Zinc-coordinated conjugated microporous polymer, *ChemSusChem*, 2014, **7**, 2110–2114.
- S5. S. Bhunia, R. A. Molla, V. Kumari, S. M. Islam and A. Bhaumik, Zn(II) assisted synthesis of porous salen as an efficient heterogeneous scaffold for capture and conversion of CO<sub>2</sub>, *Chem. Commun.*, 2015, **51**, 15732–15735.
- S6. C. Zhang, D. Lu, Y. Leng and P. Jiang, Metal-salen-bridged ionic networks as efficient bifunctional solid catalysts for chemical fixation of CO<sub>2</sub> into cyclic

- carbonates, *Mol. Catal.*, 2017, **439**, 193–199.
- S7. Y. Zheng, X. Wang, C. Liu, B. Yu, W. Li, H. Wang, T. Sun and J. Jiang, Triptycene-supported bimetallic salen porous organic polymers for high efficiency CO<sub>2</sub> fixation to cyclic carbonates, *Inorg. Chem. Front.*, 2021, **8**, 2880–2888.
- S8. J. Wang and Y. Zhang, Facile synthesis of N-rich porous azo-linked frameworks for selective CO<sub>2</sub> capture and conversion, *Green Chem.*, 2016, **18**, 5248–5253.
- S9. F. Tang, J. Hou, K. Liang, J. Huang and Y.-N. Liu, Melamine-based metal-chelating porous organic polymers for efficient CO<sub>2</sub> capture and conversion, *Eur. J. Inorg. Chem.*, 2018, **2018**, 4175–4180.
- S10. Y. Chen, R. Luo, Q. Xu, W. Zhang, X. Zhou and H. Ji, State-of-the-art aluminum porphyrin-based heterogeneous catalysts for the chemical fixation of CO<sub>2</sub> into cyclic carbonates at ambient conditions, *ChemCatChem*, 2017, **9**, 767–773.
- S11. J. Chen, M. Zhong, L. Tao, L. Liu, S. Jayakumar, C. Li, H. Li and Q. Yang, The cooperation of porphyrin-based porous polymer and thermal-responsive ionic liquid for efficient CO<sub>2</sub> cycloaddition reaction, *Green Chem.*, 2018, **20**, 903–911.
- S12. Y. Chen, R. Luo, Q. Xu, J. Jiang, X. Zhou and H. Ji, Charged metalloporphyrin polymers for cooperative synthesis of cyclic carbonates from CO<sub>2</sub> under ambient conditions, *ChemSusChem*, 2017, **10**, 2534–2541.
- S13. J. Chen, P. Zhao, D. Li, L. Liu and H. Li, Achieving the transformation of captured CO<sub>2</sub> to cyclic carbonates catalyzed by a bipyridine copper complex-intercalated porous organic framework, *Ind. Eng. Chem. Res.*, 2020, **59**, 9423–9431.
- S14. X. Zhang, J. Ding, B. Qiu, D. Li, Y. Bian, D. Zhu, S. Wang, W. Mai, S. Ming, J. Chen and T. Li, Ultralow Co loading phenanthroline-based porous organic polymer as a high-efficient heterogeneous catalyst for the fixation of CO<sub>2</sub> to cyclic carbonates at ambient conditions, *ChemCatChem*, 2021, **13**, 2664–2673.
- S15. G. P. Ji, Z. Z. Yang, H. Y. Zhang, Y. F. Zhao, B. Yu, Z. S. Ma and Z. M. Liu, Hierarchically mesoporous o-hydroxyazobenzene polymers: synthesis and their applications in CO<sub>2</sub> capture and conversion, *Angew. Chem., Int. Ed.*, 2016, **55**, 9685–9689.
- S16. J. Yin, T. Zhang, E. Schulman, D. Liu and J. Meng, Hierarchical porous

metallized poly-melamine-formaldehyde (PMF) as a low-cost and high-efficiency catalyst for cyclic carbonate synthesis from CO<sub>2</sub> and epoxides, *J. Mater. Chem. A*, 2018, **6**, 8441–8448.

S17. T. Wang, X. Song, Q. Luo, X. Yang, S. Chong, J. Zhang and M. Ji, Acid-base bifunctional catalyst: carboxyl ionic liquid immobilized on MIL-101-NH<sub>2</sub> for rapid synthesis of propylene carbonate from CO<sub>2</sub> and propylene oxide under facile solvent-free conditions, *Micropor. Mesopor. Mater.*, 2018, **267**, 84–92.

S18. C. Cui, R. Sa, Z. Hong, H. Zhong and R. Wang, Ionic-liquid-modified click-based porous organic polymers for controlling capture and catalytic conversion of CO<sub>2</sub>, *ChemSusChem*, 2020, **13**, 180–187.
